# Supplementary material
Source: PubMed Central journal article supplement (PMC5878932)
Supplement: NIHMS950993-supplement-1-6.pdf [file NIHMS950993-supplement-1-6.pdf]

**Table S1. Patients and samples included in dataset, Related to Figure 1.**

| Designation | Age/Sex | Primary Site             | Lymph Node(s) Collected | Pathologic Stage | Grade | PNI     | LVI     | ECE     |
|-------------|---------|--------------------------|-------------------------|------------------|-------|---------|---------|---------|
| MEEI5       | 69/F    | Left lateral tongue      | Left level 2            | T2N1             | 2     | Present | Present | Absent  |
| MEEI6       | 88/F    | Right floor of mouth     | Left level 2            | T4aN2c           | 1     | Present | Present | Present |
| MEEI7       | 71/F    | Right floor of mouth     | --                      | T1N2b            | 3     | Absent  | Present | Present |
| MEEI8       | 82/F    | Right hard palate        | --                      | T4aN0            | 1     | Absent  | Absent  | --      |
| MEEI9       | 77/F    | Right lateral tongue     | --                      | T1N0             | 2     | Absent  | Absent  | --      |
| MEEI10      | 76/M    | Right retromolar trigone | --                      | T4aN2b           | 2     | Absent  | Absent  | Present |
| MEEI12      | 80/M    | Left retromolar trigone  | --                      | T4aN0            | 2     | Present | Present | --      |
| MEEI13      | 52/F    | Left lateral tongue      | --                      | T3N1             | 2     | Present | Present | Absent  |
| MEEI16      | 63/F    | Left lateral tongue      | --                      | T2N0             | 1     | Absent  | Absent  | --      |
| MEEI17      | 59/M    | Right alveolar ridge     | --                      | T4aN0            | 2     | Present | Absent  | --      |
| MEEI18      | 41/M    | Left lateral tongue      | --                      | T3N1             | 2     | Present | Present | Absent  |
| MEEI20      | 53/M    | Right floor of mouth     | Right level 3           | T4aN2c           | 2     | Present | Present | Present |
| MEEI22      | 77/M    | Left buccal mucosa       | --                      | T1N0             | 2     | Absent  | Absent  | --      |
| MEEI23      | 56/M    | Right retromolar trigone | --                      | T3N1             | 2     | Absent  | Present | Absent  |
| MEEI24      | 78/F    | Right alveolar ridge     | --                      | T4aN2c           | 2     | Absent  | Absent  | Absent  |
| MEEI25      | 76/F    | Left lateral tongue      | Left level 2            | T3N1             | 2     | Present | Present | Present |
| MEEI26      | 51/M    | Left floor of mouth      | Right and left level 1  | T4aN2c           | 3     | Present | Present | Absent  |
| MEEI28      | 58/M    | Right lateral tongue     | Left level 2            | T2N2c            | 1     | Present | Present | Absent  |

PNI = perineural invasion; LVI = lymphovascular invasion; ECE = extracapsular extension

**Table S2. Clinical and pathologic features of deeply sequenced samples, Related to Figure 1.** p16 immunohistochemistry and HPV *in situ* hybridization were negative for all samples.

| Designation | Primary Site     | Size (cm) | Description                                        | LN Involved                    | Stage  | Grade | PNI     | LVI     | ECE     | p16 IHC | HPV PCR |
|-------------|------------------|-----------|----------------------------------------------------|--------------------------------|--------|-------|---------|---------|---------|---------|---------|
| MEEI 5      | L lateral tongue | 3.8       | Invasive SCC, keratinizing                         | 1/21, L level 2, < 1.0cm       | T2N1   | 2     | Present | Present | Absent  | (-)     | (-)     |
| MEEI 6      | R floor of mouth | 3.9       | Invasive SCC, keratinizing, involving bone         | 5/34, bilateral, largest 1.8cm | T4aN2c | 1     | Present | Present | Present | (-)     | (-)     |
| MEEI 16     | L lateral tongue | 2.2       | Invasive SCC, keratinizing                         | 0/23                           | T2N0   | 1     | Absent  | Absent  | --      | (-)     | (-)     |
| MEEI 17     | R alveolar ridge | 3.8       | Invasive SCC, keratinizing, involving bone         | 0/30                           | T4aN0  | 2     | Present | Absent  | --      | (-)     | (-)     |
| MEEI 18     | L lateral tongue | 5.5       | Invasive SCC, keratinizing                         | 1/23, L level I, 0.4cm         | T3N1   | 2     | Present | Present | Absent  | (-)     | (-)     |
| MEEI 20     | R floor of mouth | 5.2       | Invasive SCC, non-keratinizing, basaloid, necrotic | 5/50, bilateral, largest 3.0cm | T4aN2c | 2     | Present | Present | Present | (-)     | (-)     |
| MEEI 22     | L buccal mucosa  | 2.0       | Invasive SCC, keratinizing                         | Not examined                   | T1N0   | 2     | Absent  | Absent  | --      | (-)     | (-)     |
| MEEI 25     | L floor of mouth | 6.2       | Invasive SCC, keratinizing                         | 1/9, L level 2, 2.5cm          | T3N1   | 2     | Present | Present | Present | (-)     | (-)     |
| MEEI 26     | L floor of mouth | 3.6       | Invasive SCC, involving bone and muscle            | 2/72, bilateral, largest 1.6cm | T4aN2c | 3     | Present | Present | Absent  | (-)     | (-)     |
| MEEI 28     | R lateral tongue | 3.0       | Invasive SCC, keratinizing                         | 4/20, bilateral, largest 2.1cm | T2N2c  | 1     | Present | Present | Absent  | (-)     | (-)     |

L = left; R = right; SCC = squamous cell carcinoma; PNI = perineural invasion; LVI = lymphovascular invasion; ECE = extracapsular extension; IHC = immunohistochemistry; HPV = human papillomavirus; PCR = polymerase chain reaction

**Table S3. Mutations and copy number variations detected in profiled primary tumors, Related to Figure 1.** Common mutations evaluated by whole exome sequencing of a subset of samples and SNaPshot next generation sequencing assay of all samples include the top 5 mutations in TCGA HNSCC tumors, as well as mutations in TERT promoter. CNVs evaluated include top 4 abnormalities noted in TCGA HNSCC tumors.

|                  |               | Reported         | MEEI5              | MEEI6              | MEEI16           | MEEI17                                     | MEEI18                                   | MEEI20             | MEEI22           | MEEI25             | MEEI26              | MEEI28                                                                               |
|------------------|---------------|------------------|--------------------|--------------------|------------------|--------------------------------------------|------------------------------------------|--------------------|------------------|--------------------|---------------------|--------------------------------------------------------------------------------------|
| Common Mutations | TP53          | 72% <sup>a</sup> | Mut <sup>1,2</sup> | Mut <sup>2</sup>   | ND               | ND                                         | Mut <sup>2</sup>                         | Mut <sup>1,2</sup> | Mut <sup>2</sup> | Mut <sup>1,2</sup> | Mut <sup>1,2</sup>  | ND                                                                                   |
|                  | TERT promoter | 30% <sup>b</sup> | Mut <sup>2</sup>   | ND                 | Mut <sup>2</sup> | Mut <sup>2</sup>                           | ND                                       | ND                 | Mut <sup>2</sup> | Mut <sup>2</sup>   | ND                  | Mut <sup>2</sup>                                                                     |
|                  | FAT1          | 23% <sup>a</sup> | ND                 | ND                 | ND               | ND                                         | ND                                       | ND                 | ND               | Mut <sup>1</sup>   | ND                  | ND                                                                                   |
|                  | CDKN2A        | 22% <sup>a</sup> | ND                 | ND                 | ND               | ND                                         | ND                                       | Mut <sup>1,2</sup> | Mut <sup>2</sup> | Mut <sup>1</sup>   | ND                  | ND                                                                                   |
|                  | PIK3CA        | 21% <sup>a</sup> | Mut <sup>1,2</sup> | ND                 | ND               | ND                                         | Mut <sup>2</sup>                         | ND                 | ND               | ND                 | ND                  | ND                                                                                   |
|                  | NOTCH1        | 19% <sup>a</sup> | ND                 | ND                 | ND               | ND                                         | ND                                       | Mut <sup>1</sup>   | ND               | ND                 | ND                  | Mut <sup>1</sup>                                                                     |
| Other            | --            | --               | TSC2 <sup>2</sup>  | FBXW7 <sup>2</sup> | --               | AJUBA <sup>1</sup> ,<br>FBXW7 <sup>2</sup> | MET <sup>2</sup> ,<br>BRCA2 <sup>2</sup> | NSD1 <sup>1</sup>  | --               | --                 | NFE2L2 <sup>1</sup> | AJUBA <sup>1</sup> , TGFB2 <sup>1</sup> ,<br>SMARCB1 <sup>2</sup> , CIC <sup>2</sup> |
| CNVs             | 3p loss       | 57%              | ++                 | +                  | ND               | ND                                         | ++                                       | ++                 | ++               | ND                 | ND                  | ND                                                                                   |
|                  | 3q gain       | 44%              | ++                 | +                  | ++               | ND                                         | ++                                       | ++                 | ++               | ND                 | ++                  | ND                                                                                   |
|                  | 8p loss       | 29%              | ++                 | ND                 | ND               | ND                                         | ++                                       | +                  | +                | ++                 | ND                  | +                                                                                    |
|                  | 8q gain       | 56%              | ++                 | +                  | ND               | ND                                         | ++                                       | ++                 | ++               | ++                 | ND                  | ND                                                                                   |

<sup>a</sup>Reported in TCGA; <sup>b</sup>reported in Morris et al. (2016); Mut = mutation detected; ND = mutation not detected; <sup>1</sup>mutation detected by whole exome sequencing; <sup>2</sup>mutation detected by SNaPshot; CNV = copy number variation

**Table S5. Differentially expressed genes between CAF subsets, Related to Figure 2.**  
Genes are sorted from most to least significant.

| CAF1 genes |              |               |               |               | CAF2 genes |              |               |               |               |
|------------|--------------|---------------|---------------|---------------|------------|--------------|---------------|---------------|---------------|
| Genes 1-50 | Genes 51-100 | Genes 101-150 | Genes 151-200 | Genes 201-208 | Genes 1-50 | Genes 51-100 | Genes 101-150 | Genes 151-200 | Genes 201-241 |
| CTHRC1     | COL5A2       | CPTM1         | LOXL3         | CXCL6         | CFD        | ANGPTL1      | CLU           | FBLN5         | TMEM176A      |
| COL1A1     | GBP1         | RGS3          | COL6A2        | FBXO32        | APOD       | JUNB         | LHFP          | SCARA5        | ADH5          |
| POSTN      | ITGB1        | MYO1B         | GEM           | FKBP10        | CXCL12     | RPL13A       | NDRG2         | PROS1         | IL11RA        |
| TPM4       | IL24         | WBP5          | TGFBI         | PTS           | GPC3       | CILP         | SOD3          | FOXO3         | C5orf4        |
| MFAP2      | PLAU         | MYH9          | SGCB          | SMIM3         | SEPP1      | MEG3         | TFPI          | RECK          | CYP27A1       |
| SPARC      | AEBP1        | ITGB5         | PDLIM3        | TRIB2         | GSN        | JUN          | NFIB          | SLPI          | CBLB          |
| WNT5A      | COL1A2       | SEC23A        | FKBP9         | HEPH          | CXCL14     | CD34         | MTUS1         | RPL22         | PID1          |
| COL3A1     | TPM2         | HSPB1         | EDNRA         | RRBP1         | MFAP4      | FOSB         | TENC1         | ANKRD36BP1    | EGFR          |
| LOC541471  | CLEC11A      | FRMD6         | ITM2C         |               | GPX3       | MTRNR2L1     | EBF1          | EBF2          | TMEM159       |
| TNFRSF12A  | AXL          | PDLIM7        | CRISPLD2      |               | MGP        | VIM          | STOM          | ECHDC2        | MT1M          |
| INHBA      | ADAMTS2      | PRKCDBP       | F2RL2         |               | SPARCL1    | CHRDL1       | ZFAS1         | AGT           | PPP1R10       |
| THY1       | IGFBP3       | ILK           | RCN1          |               | LTBP4      | SERPINA3     | SAMHD1        | NPDC1         | ARHGAP10      |
| SERPINH1   | GREM1        | WIP1          | IL8           |               | ADH1B      | TIMP3        | IGFBP5        | DDIT3         | NID1          |
| LOXL2      | MMP1         | CDH11         | RAB2A         |               | ZBTB16     | TGFBR3       | KLF4          | TPPP3         | SLIT3         |
| RAB31      | DUSP14       | PLAT          | F2R           |               | ABCA8      | NTRK2        | CDO1          | PLSCR4        | CRTAP         |
| GPM6B      | TAGLN        | SGIP1         | SEC31A        |               | C3         | MYOC         | ADAM33        | NXF1          | CAB39L        |
| ACTN1      | PPIC         | STEAP1        | C12orf75      |               | IGF1       | THBS4        | PCDHGC3       | F10           | CDC42EP4      |
| IFI27      | REEP3        | PON2          | STARD13       |               | PODN       | CST3         | PRNP          | AKR1C3        | SLC19A2       |
| LGALS1     | RAP1B        | HAS2          | TWSG1         |               | PRELP      | PLAC9        | EPB41L2       | PDGFD         | SLC40A1       |
| SERPINE1   | TNFRSF21     | PTEN          | MRPL32        |               | PDK4       | PI16         | FBLN2         | CTSF          | SPG20         |
| PLAUR      | CTSK         | FMOD          | RSU1          |               | FHL1       | IGFBP6       | GADD45B       | FCGRT         | CALCOCO1      |
| HIF1A      | SPON2        | CALD1         | FBN1          |               | ABI3BP     | IER2         | VAT1          | RARRES1       | SDC2          |
| CHN1       | RARRES2      | MMP3          | B4GALT1       |               | RNASE4     | FGL2         | PLAGL1        | MATN2         | BCL6          |
| THBS2      | LEPRE1       | PHLDA2        | VCL           |               | PLA2G2A    | RPL14        | CFH           | ZNF460        | DDX39B        |
| ASPEN      | RHOC         | P4HA2         | TD02          |               | BTG2       | COL14A1      | BTF3          | CYR61         | GNPMB         |
| TNC        | PRSS23       | ECM1          | CCL2          |               | TNXB       | RAMP2        | KIAA1683      | CDKN1A        | MT1A          |
| ARF4       | H1FO         | SNAI2         | MARCKS        |               | CYBRD1     | DHRS3        | ESD           | INMT          | BDH2          |
| CALU       | PLOD2        | FNDC3B        | CNIH4         |               | FBLN1      | OLFML3       | EDNRB         | EIF1B         | ENPP2         |
| LUM        | KIAA1217     | UBD           | GOLM1         |               | HSPB6      | ABLIM1       | MYC           | SOCS3         | SYNPO2        |
| TWIST1     | C1QTNF6      | BMP1          | CNN3          |               | MGST1      | CD302        | LEPR          | APP           | IL6ST         |
| MMP11      | CPE          | SDC4          | STEAP2        |               | ZFP36      | CCDC80       | GAS6          | ITIH5         | SERINC1       |
| SPHK1      | IFITM1       | FAP           | DKK3          |               | VIT        | RBMS3        | DDAH2         | GABARAPL1     | TRIP10        |
| PRDM1      | MYL6         | NPTN          | ANXA5         |               | SFRP1      | MT1X         | FIBIN         | GSTM2         | PLBD1         |
| NREP       | PHLDA1       | GNAI1         | TMEM30A       |               | ADAMTS1    | FOS          | C7            | RASD1         | PHF17         |
| LY6E       | LTBP1        | CLIC4         | MRPS24        |               | MAMDC2     | CAPN6        | SPTBN1        | NR4A1         | MT1E          |
| TNFAIP6    | ANTXR1       | AQP1          | MMP19         |               | PLTP       | LAMA2        | RPL10A        | NT5E          | NFKBIZ        |
| BPGM       | YIF1A        | ITGA1         | EPAS1         |               | SRPX       | HSPA1B       | ITM2B         | MAP1LC3C      | MOB3B         |
| COL5A1     | CRABP2       | LAMP5         | KCTD10        |               | PDGFRL     | ABCA6        | BRD2          | EPB41L4-AS1   | SELENBP1      |
| CAV1       | ITGA5        | FADS1         | IER3IP1       |               | ALDH1A1    | MFAP5        | CPQ           | ACVR2A        | TCEA3         |
| TMEM45A    | COL6A3       | MYL9          | TNFRSF6B      |               | EFEMP1     | FXYD6        | HSD17B11      | RPS4Y1        | AKAP12        |
| COL12A1    | TWIST2       | SELM          | CD59          |               | A2M        | OGN          | CEBPD         | TNFAIP2       | PPAP2A        |
| PXDN       | SULF1        | FN1           | ID1           |               | MTRNR2L2   | LRP1         | GSTM5         | FAM13C        |               |
| PDPN       | C1orf198     | ANGPTL2       | DDAH1         |               | SMOC2      | PPP1R15A     | SESN1         | CPED1         |               |
| RIN2       | SRPX2        | HAPLN3        | STC1          |               | MTRNR2L8   | COL15A1      | PDGFRA        | TGFBR2        |               |
| S100A16    | LMCD1        | SULF2         | SLC39A6       |               | PTGDS      | ADIRF        | ANG           | SCPEP1        |               |
| IL1R1      | KDELR3       | FAM114A1      | PGM3          |               | NFIA       | ALDH2        | FMO2          | RND3          |               |
| PTK7       | PKIG         | ID3           | PLOD1         |               | DPT        | PPAP2B       | CTGF          | HSPB8         |               |
| TPM1       | IFIT3        | TSKU          | C12orf23      |               | FGF7       | METTL7A      | BMP4          | SGCE          |               |
| RCN3       | VMP1         | ACTA2         | CTTN          |               | ITM2A      | WISP2        | ZFAND5        | ASS1          |               |
| COL6A1     | RABAC1       | C5orf15       | GGT5          |               | FIGF       | LGALS3       | GALNT16       | LAMB2         |               |

**Table S7. Six meta-signatures, each derived from multiple related NMF programs, Related to Figure 3. Genes in each program are ordered from most to least significant.**

| Cell Cycle |              | p-EMT      |              | Epi dif. 1 |              | Epi dif. 2 |              | Stress     |              | Hypoxia    |              |
|------------|--------------|------------|--------------|------------|--------------|------------|--------------|------------|--------------|------------|--------------|
| Genes 1-50 | Genes 51-100 |
| TK1        | MCM5         | SERPINE1   | ARPC1B       | IL1RN      | MALAT1       | LY6D       | UBE2L6       | FOS        | C1R          | NDRG1      | ZFP36L1      |
| HMGB2      | PLK1         | TGFB1      | APP          | SLPI       | TRIP10       | KRT16      | WDR74        | ATF3       | PHLDA2       | IGFBP3     | HLA-E        |
| ZWINT      | GGH          | MMP10      | MFAP2        | CLDN4      | CAST         | KRT6B      | PPIF         | NR4A1      | DNAJB14      | PTHLH      | PIK3IP1      |
| MAD2L1     | MCM4         | LAMC2      | MPZL1        | S100A9     | TMPRSS4      | LYPD3      | PRMT5        | DUSP1      | MCL1         | EGLN3      | CLK3         |
| TUBA1B     | CENPN        | P4HA2      | DFNA5        | SPRR1B     | TOM1         | KRT6C      | VSNL1        | ZFP36      | HERPUD1      | BNIP3      | POLR1D       |
| STMN1      | TMPO         | PDPN       | MT2A         | PVRL4      | A2ML1        | TYMP       | VPS25        | PPP1R15A   | ADRB2        | NDUFA4L2   | BTG1         |
| KIF22      | CDCA3        | ITGA5      | MAGED2       | RHCG       | MBOAT2       | FABP5      | SNRNP40      | SGK1       | EIF4A3       | ERO1L      | NPC2         |
| CKS1B      | DEK          | LAMA3      | ITGA6        | SDCBP2     | LGALS3       | SCO2       | ADRM1        | EGR1       | TACSTD2      | P4HA1      | LAMP2        |
| H2AFZ      | RPA2         | CDH13      | FSTL1        | S100A8     | ERO1L        | FGFBP1     | NDUFS8       | ZC3H12A    | ID1          | SLC2A1     | DSG2         |
| CENPW      | KIF2C        | TNC        | TNFRSF12A    | APOBEC3A   | EHF          | JUP        | TUBA1C       | JUNB       | ETS2         | ENO2       | SAT1         |
| CDC20      | CDK1         | MMP2       | IL32         | GRHL1      | LCN2         | IMP4       | TMEM79       | FOSB       | CD74         | HK2        | AK4          |
| DTYMK      | CDCA5        | EMP3       | COPB2        | SULT2B1    | YPEL5        | DSC2       | UQCRCFS1     | IER2       | TRIB1        | PGF        | SMS          |
| UBE2C      | LSM4         | INHBA      | PTK7         | ELF3       | ALDH3B2      | TMBIM1     | EIF3K        | NFKBIA     | SLC20A1      | LDHA       | FRMD6        |
| UBE2T      | KNSTRN       | LAMB3      | OCIAD2       | KRT16      | DMKN         | KRT14      | NME2         | NFKBIZ     | LOC284454    | PGK1       | CLDND1       |
| NUSAP1     | TUBG1        | VIM        | TAX1BP3      | PRSS8      | PIK3IP1      | C1QBP      | PKP3         | HBEGF      | EIF1         | PDK1       | ACP5         |
| RRM2       | SMC4         | SEMA3C     | SEC13        | MXD1       | CEACAM6      | SFN        | SERPINB1     | BTG2       | CXCL2        | DHRS3      | AP1G2        |
| BIRC5      | CSE1L        | PRKCDDBP   | SERPINH1     | S100A7     | OVOL1        | S100A14    | RPL26L1      | SOD2       | BRD2         | DDIT4      | TP1          |
| RNASEH2A   | UHRF1        | ANXA5      | TPM4         | KRT6B      | TMPRSS11E    | RAB38      | EIF6         | CDKN1A     | RASD1        | PVRL4      | PLAUR        |
| PCNA       | RANBP1       | DHRS7      | MYH9         | LYPD3      | CD55         | GJB5       | DSP          | NCOA7      | LDLR         | GNPMB      | BCL10        |
| TUBB       | CDCA8        | ITGB1      | ANXA8L1      | TACSTD2    | KLK6         | MRPL14     | PHLDA2       | JUN        | EGR2         | BIK        | TMEM59       |
| KPNA2      | MCM2         | ACTN1      | PLOD2        | CDKN1A     | SPRR2D       | TRIM29     | S100A16      | MYC        | TFRC         | GJB6       | HAS3         |
| ASF1B      | RFC2         | CXCR7      | GALNT2       | KLK11      | NDRG2        | ANXA8L2    | LGALS7       | SERTAD1    | ADM          | C4orf3     | SERINC1      |
| TRIP13     | HMG2         | ITGB6      | LEPREL1      | GPRC5A     | CD24         | KRT6A      | MT1X         | CCNL1      | TGIF1        | IGFBP2     | C1orf43      |
| CCNB1      | ATAD2        | IGFBP7     | MAGED1       | KLK10      | HIST1H1C     | PDHB       | UQCRC2       | RND3       | HLA-DRB1     | FAM162A    | ENO1         |
| TPX2       | HAT1         | THBS1      | SLC38A5      | TMBIM1     | LY6D         | AKR1B10    | EIF3I        | PLK2       | OSR2         | GPI        | CSDA         |
| CCNB2      | PKMYT1       | PTHLH      | FSTL3        | PLAUR      | CLIP1        | LAD1       | MRPL24       | SOCS3      | SAA1         | LPIN3      | PFKP         |
| TYMS       | SIVA1        | TNFRSF6B   | CD99         | CLDN7      | HIST1H2AC    | DSG3       | CCT7         | DNAJB1     | ELF3         | PLAU       | KLHL24       |
| PTTG1      | FANCI        | PDLIM7     | F3           | DUOXA1     | BNIP1        | MRPL21     | RHOV         | DUSP2      | CLK1         | ADM        | HIST1H1C     |
| KIAA0101   | ECT2         | CAV1       | PSAP         | PDZK1IP1   | QSOX1        | NDUFS7     | ECE2         | TSC22D1    | PER2         | ANGPTL4    | RBPJ         |
| GMNN       | POLE3        | DKK3       | NMRK1        | NCCRP1     | ECM1         | PSMD6      | SSBP1        | KLF10      | KLF4         | DARS       | BHLHE40      |
| DNAJC9     | WDR34        | COL17A1    | FKBP9        | IDS        | DHRS3        | AHCY       | POLDIP2      | GADD45B    | GNPMB        | NUPR1      | GAPDH        |
| CCNA2      | MCM3         | LTBP1      | DSG2         | PPL        | PPP1R15A     | GBP2       | FIS1         | PMAIP1     | MXD1         | SERPINE1   | UPK3BL       |
| CKS2       | NCAPG2       | COL5A2     | ECM1         | ZNF750     | TRIM16       | TXN2       | CKMT1A       | MAFF       | UBC          | PGAM1      | LTBP1        |
| MLF1IP     | TUBB6        | COL1A1     | HTRA1        | EMP1       | AQP3         | PSMD13     | GJB3         | ERRF1      | HLA-DRA      | ALDOA      | P4HA2        |
| VRK1       | NCAPD2       | FHL2       | SERINC1      | CLDN1      | IRF6         | NOP16      | NME1         | SLC38A2    | SLC3A2       | DAAM1      | HBP1         |
| CENPM      | GINS2        | TIMP3      | CALU         | CRB3       | CSTA         | EIF4EBP1   | MRPS12       | IRF1       | OVOL1        | CXADR      | GRHL1        |
| PRC1       | TIMELESS     | PLAU       | TPST1        | CYB5R1     | RAB25        | MRPL12     | GPS1         | TOB1       | HIST1H2BK    | SEMA4B     | DDIT3        |
| SPAG5      | RAD51        | LGALS1     | PLOD3        | DSC2       | HOPX         | HSD17B10   | ALG3         | ID2        | DDX3X        | CA9        | ANXA1        |
| TOP2A      | CMC2         | PSMD2      | IGFBP3       | S100P      | GIPC1        | LGALS7B    | MRPL20       | KLF6       | LAMB3        | CIB1       | ITGA5        |
| AURKB      | OIP5         | CD63       | FRMD6        | GRHL3      | RAB11FIP1    | THBD       | EMC6         | DNAJA1     | ZNF622       | SPRR1B     | LOC100862671 |
| FEN1       | TUBB4B       | HERPUD1    | CXCL14       | SPINT1     | CSTB         | EXOSC4     | SRD5A1       | TNFAIP3    | TUBB2A       | PLIN2      | PLS3         |
| TMEM106C   | APOBEC3B     | TPM1       | SERPINE2     | SDR16C5    | KRT6C        | APRT       | PA2G4        | BHLHE40    | ZFAND5       | WSB1       | TSC22D2      |
| RRM1       | ORC6         | SLC39A14   | RABAC1       | SPRR1A     | PKP1         | ANXA8L1    | ECBIT        | NXF1       | IRF6         | HILPDA     | GLTP         |
| RFC4       | C19orf48     | C1S        | TMED9        | WBP2       | JUP          | ATP5G1     | MRPL23       | FOSL1      | TNF          | NOL3       | PLOD2        |
| MCM7       | SNRNP25      | MMP1       | NAGK         | GRB7       | MAFF         | S100A2     | NAA20        | IER3       | BTG1         | PFKFB3     | PERP         |
| CDKN3      | RCF3         | EXT2       | BMP1         | KLK7       | DSG3         | TBRG4      | HMOX2        | DUSP6      | LMNA         | IFNGR1     | MALL         |
| NUDT1      | TROAP        | COL4A2     | ESYT1        | TMEM79     | AKTIP        | MAL2       | COA4         | HCAR2      | MAP1LC3B     | H1FO       | CTNND1       |
| PBK        | EBP          | PRSS23     | STON2        | SBSN       | KLK3         | NHP2L1     | DCXR         | IL8        | TSC22D3      | KDM3A      | KDM5B        |
| MELK       | DKC1         | SLC7A8     | TAGLN        | PIM1       | HSPB8        | DDX39A     | PSMD8        | CYR61      | PLK3         | BCL6       | AHNAK2       |
| ANLN       | H2AFV        | SLC31A2    | GJA1         | CLIC3      | H1FO         | ZNF750     | WBSCR22      | EFNA1      | KLHL21       | BNIP3L     | PNRC1        |
