# Supplementary material
Source: PubMed Central journal article supplement (PMC5878932)

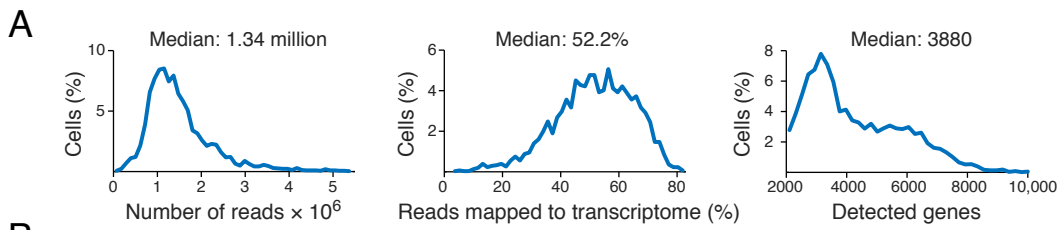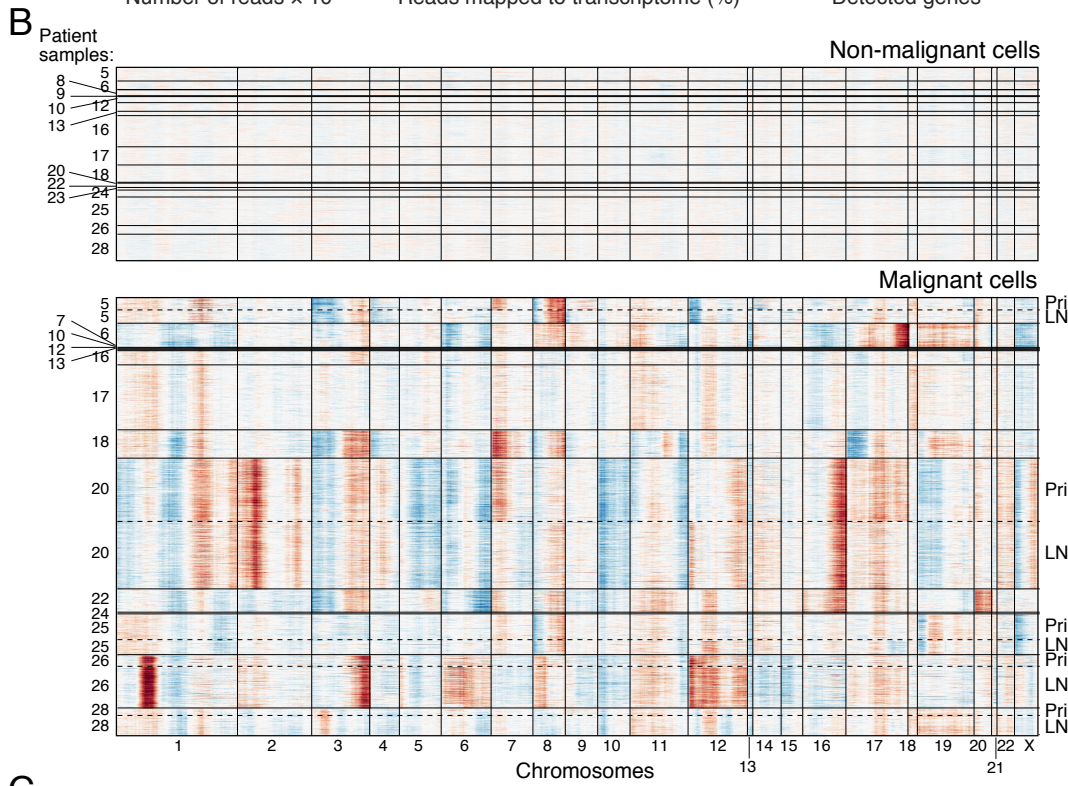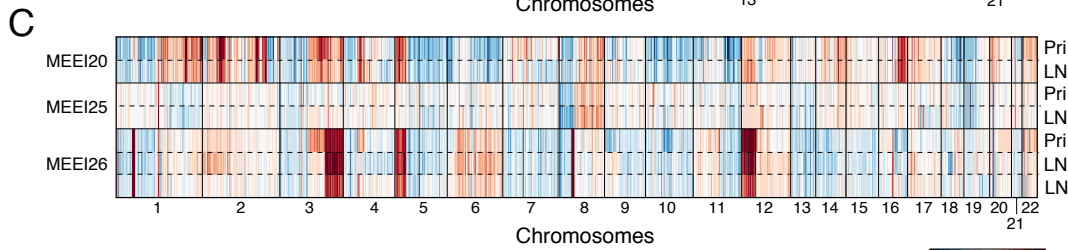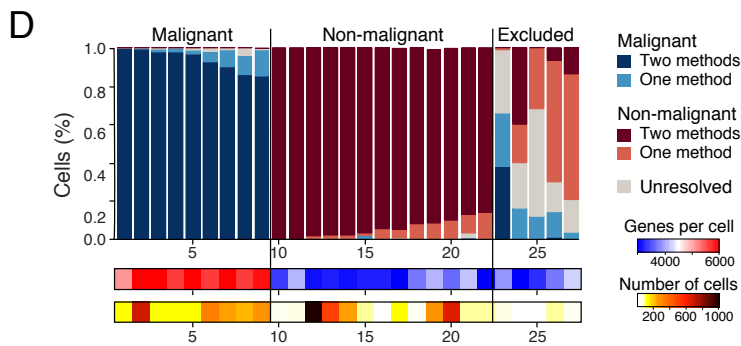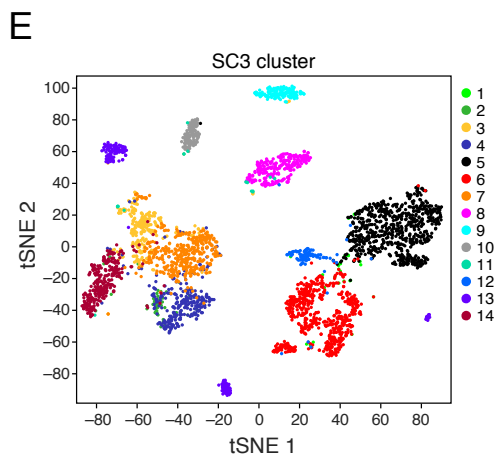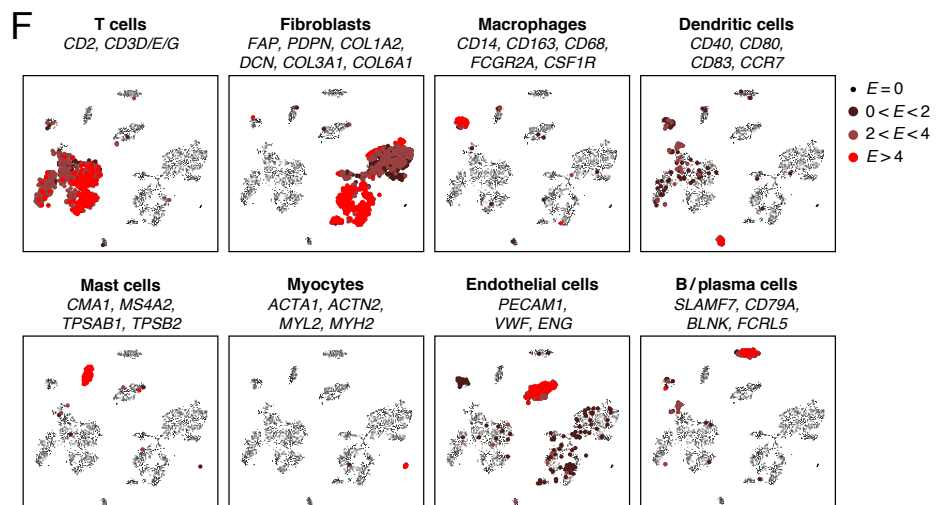

Supplement: NIHMS950993-supplement-1.pdf [file NIHMS950993-supplement-1.pdf]

# Supp. Figure 2

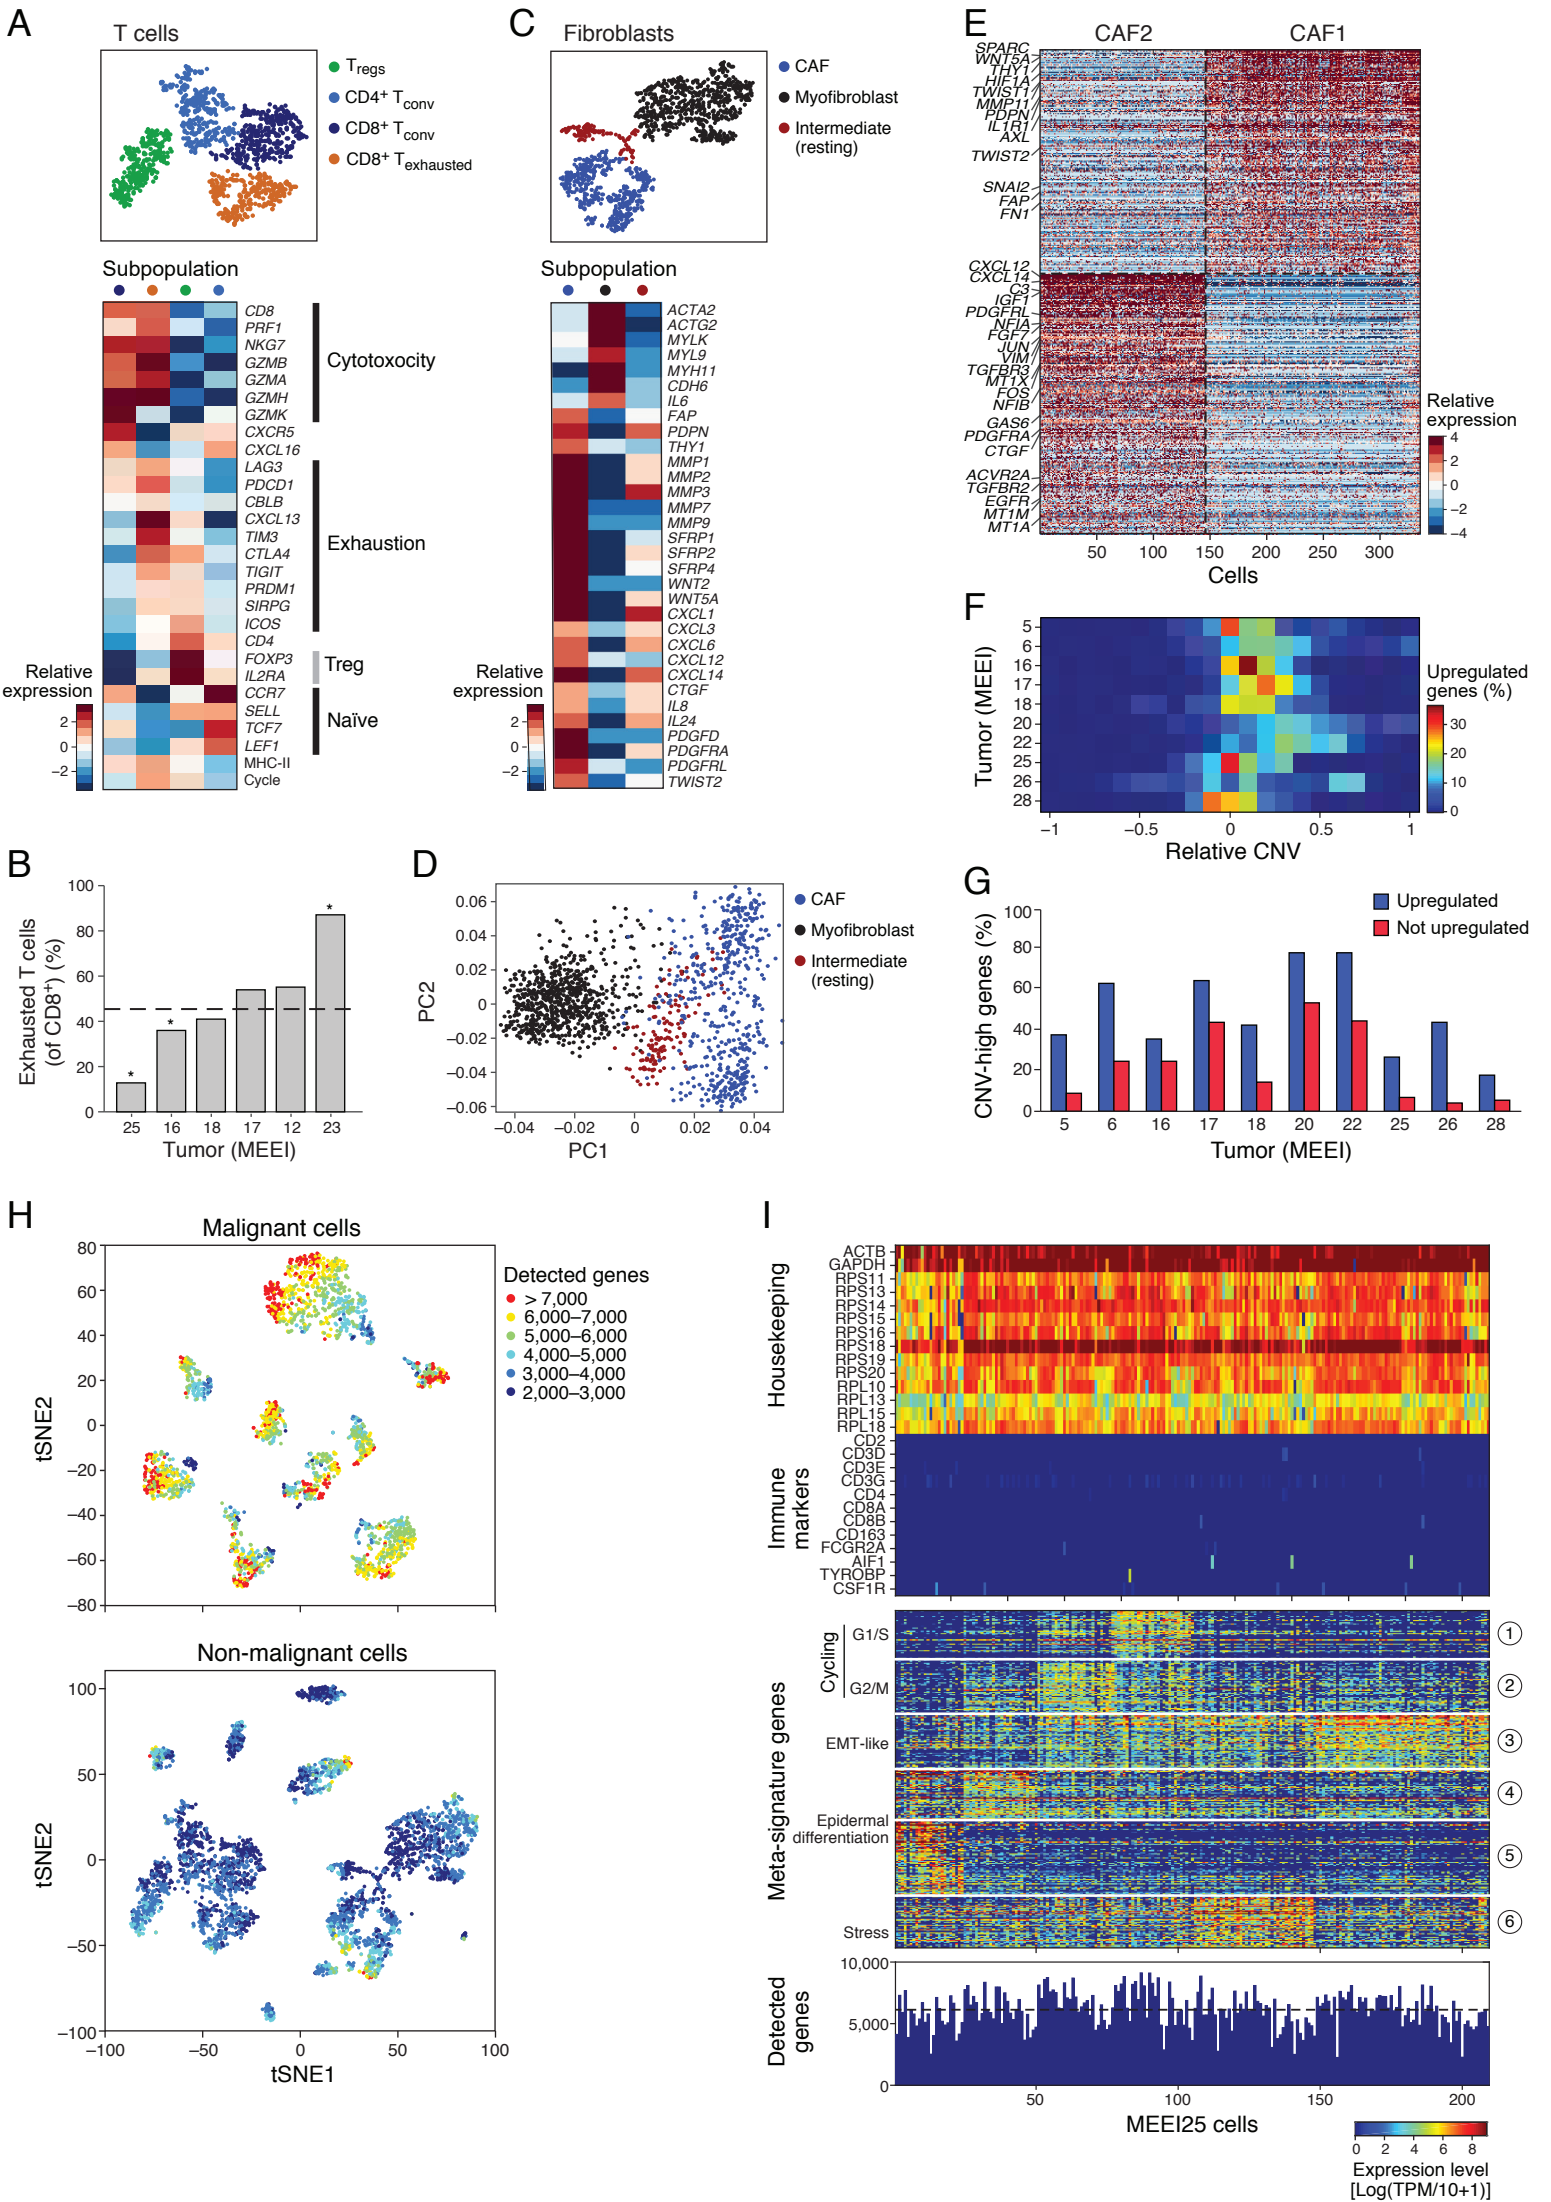

Supplement: NIHMS950993-supplement-2.pdf [file NIHMS950993-supplement-2.pdf]

# Supp. Figure 3

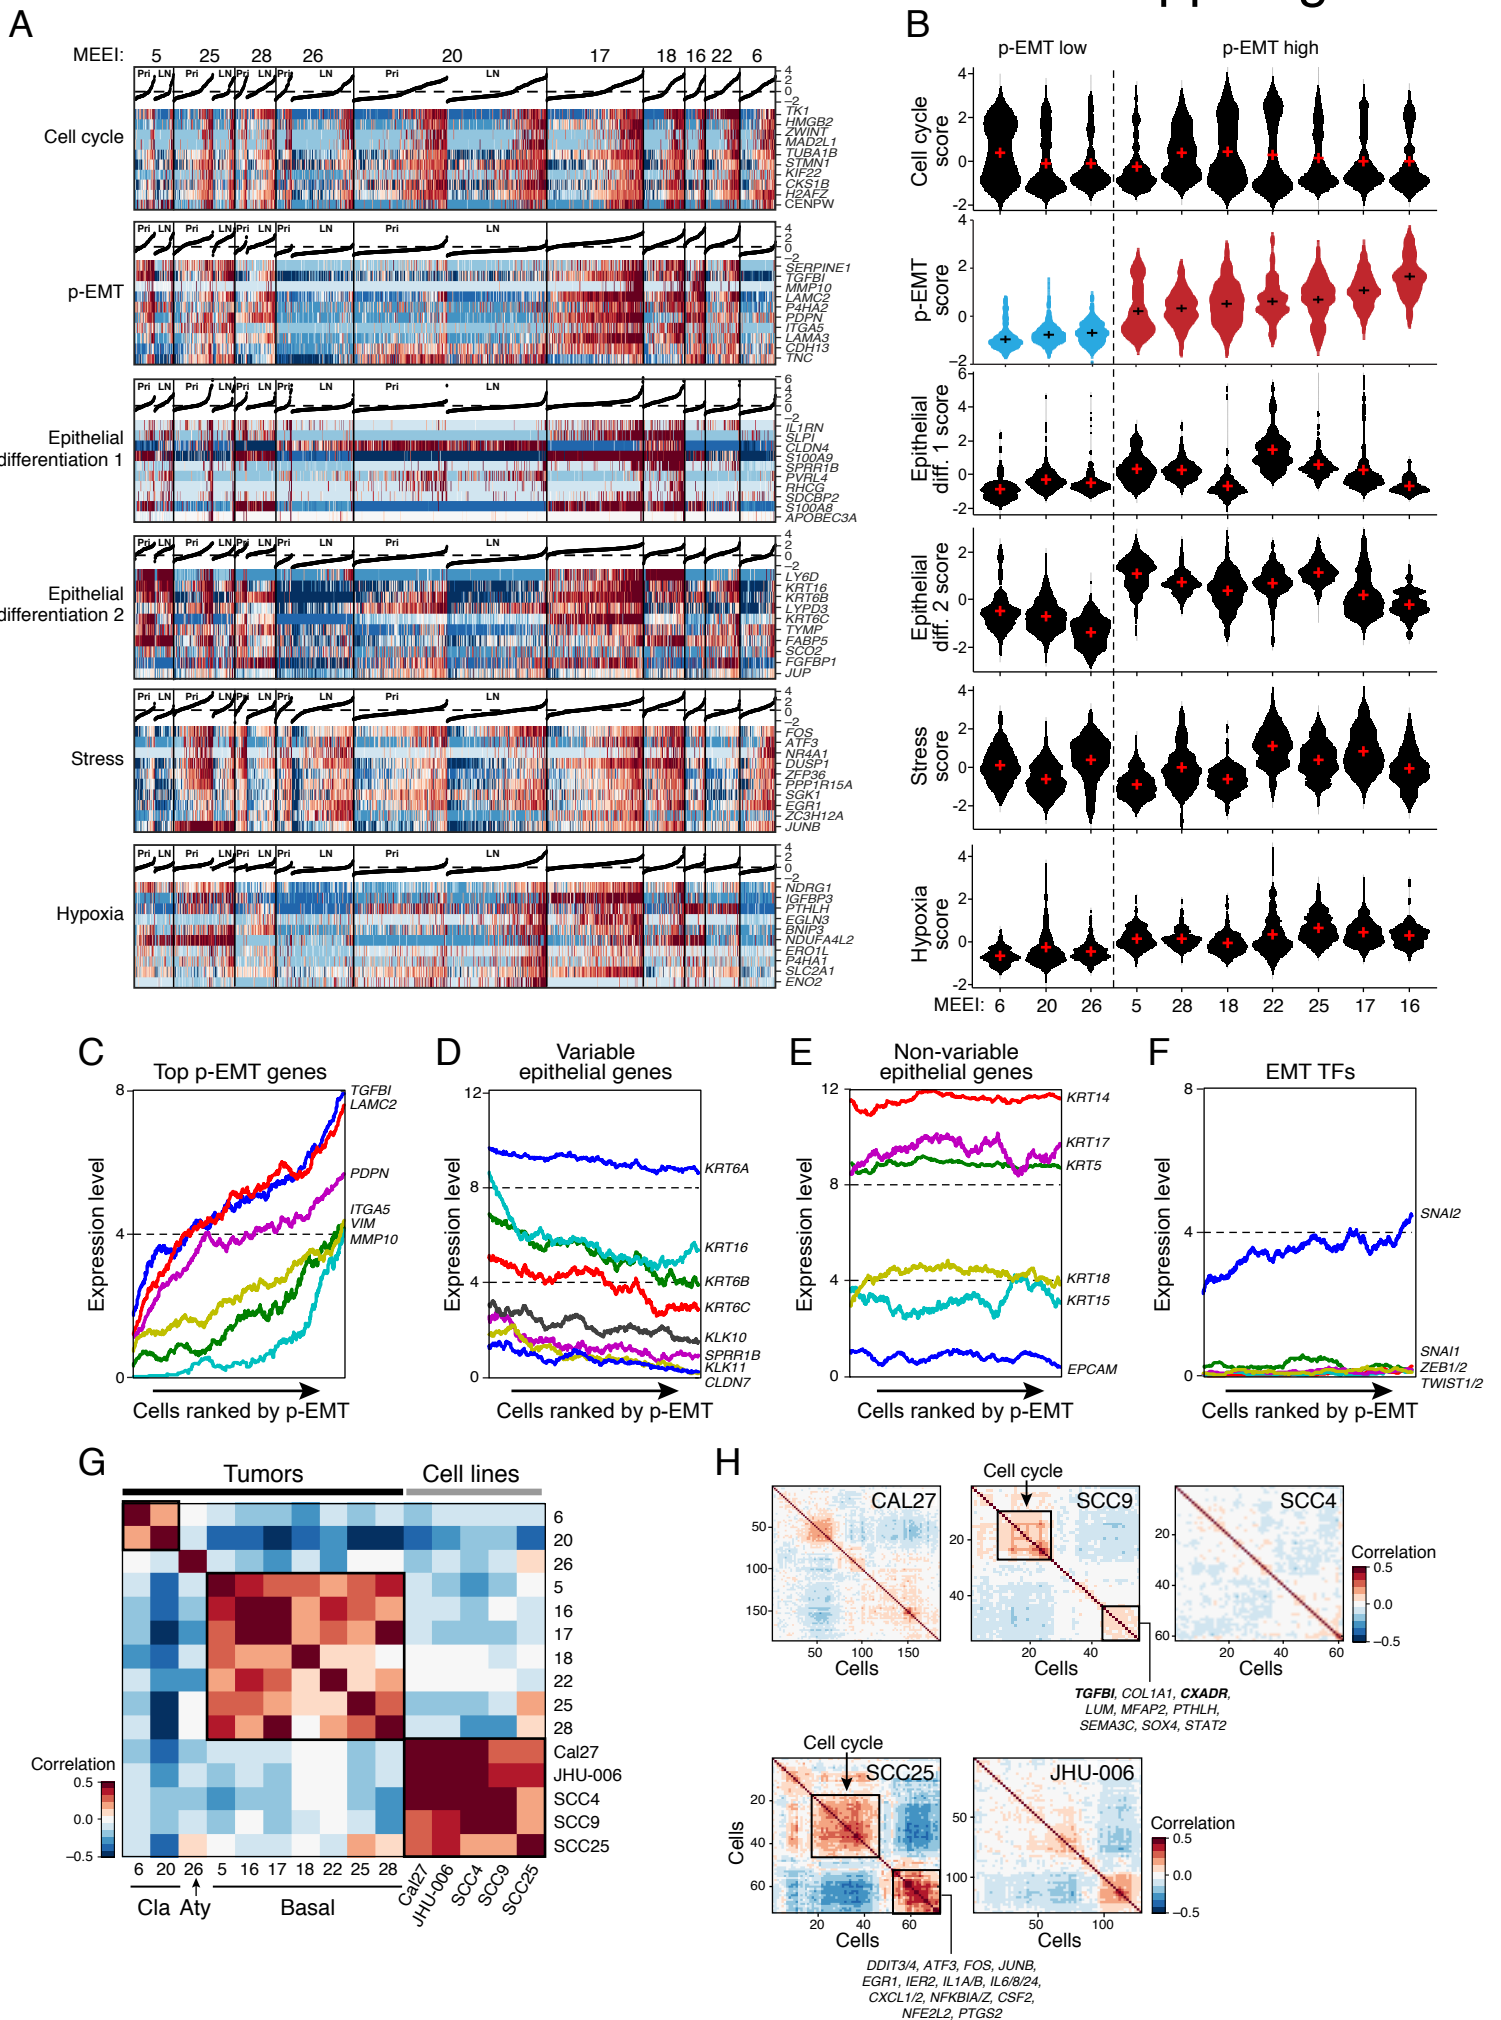

Supplement: NIHMS950993-supplement-3.pdf [file NIHMS950993-supplement-3.pdf]

# Supp. Figure 4

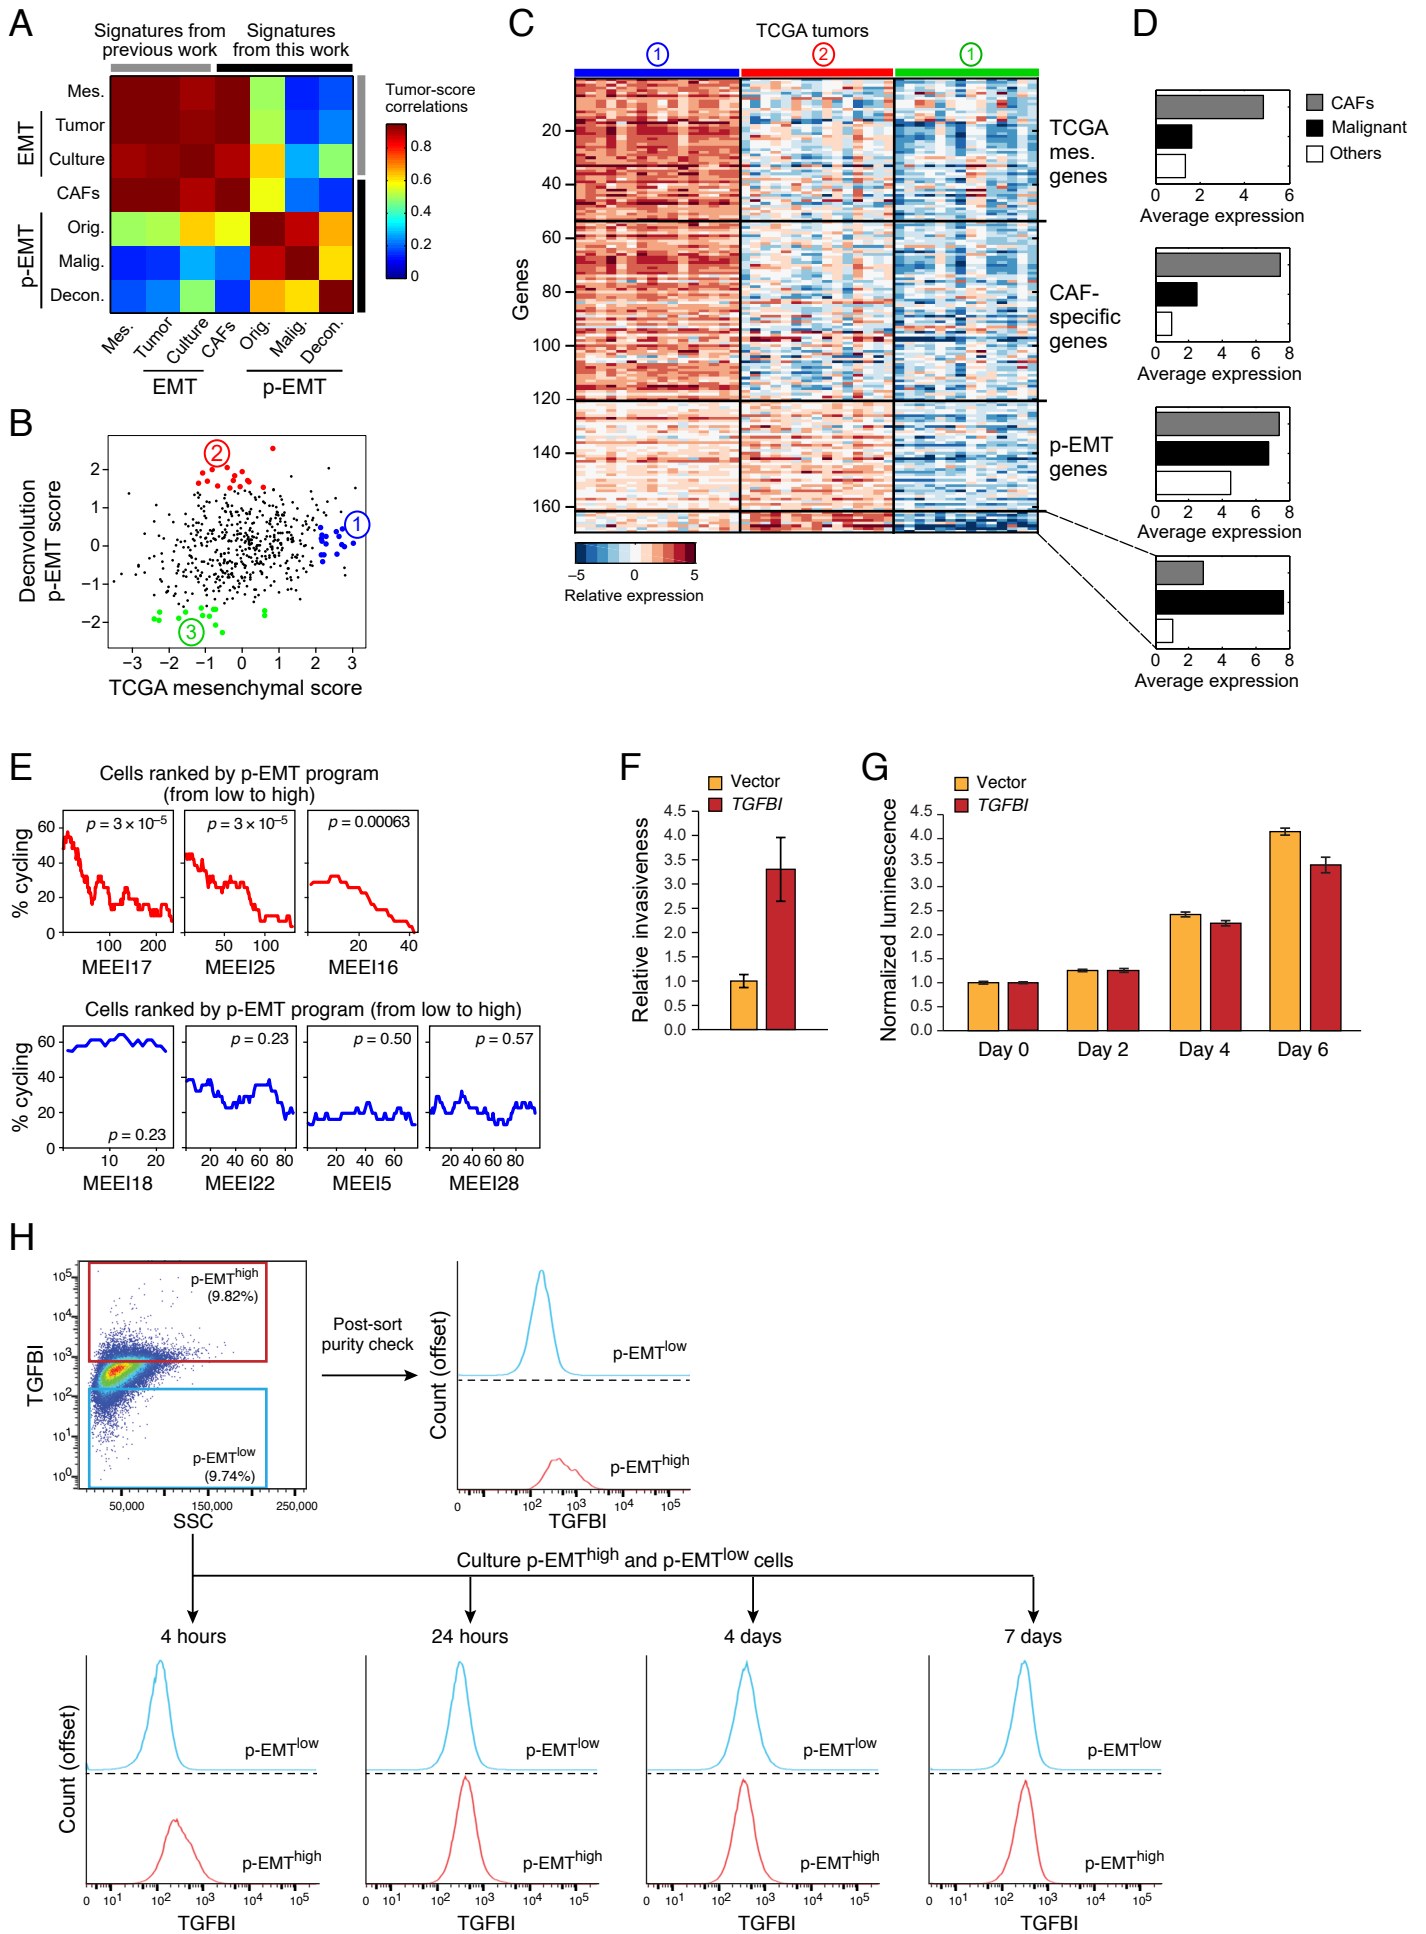

Supplement: NIHMS950993-supplement-4.pdf [file NIHMS950993-supplement-4.pdf]

# Supp. Figure 5

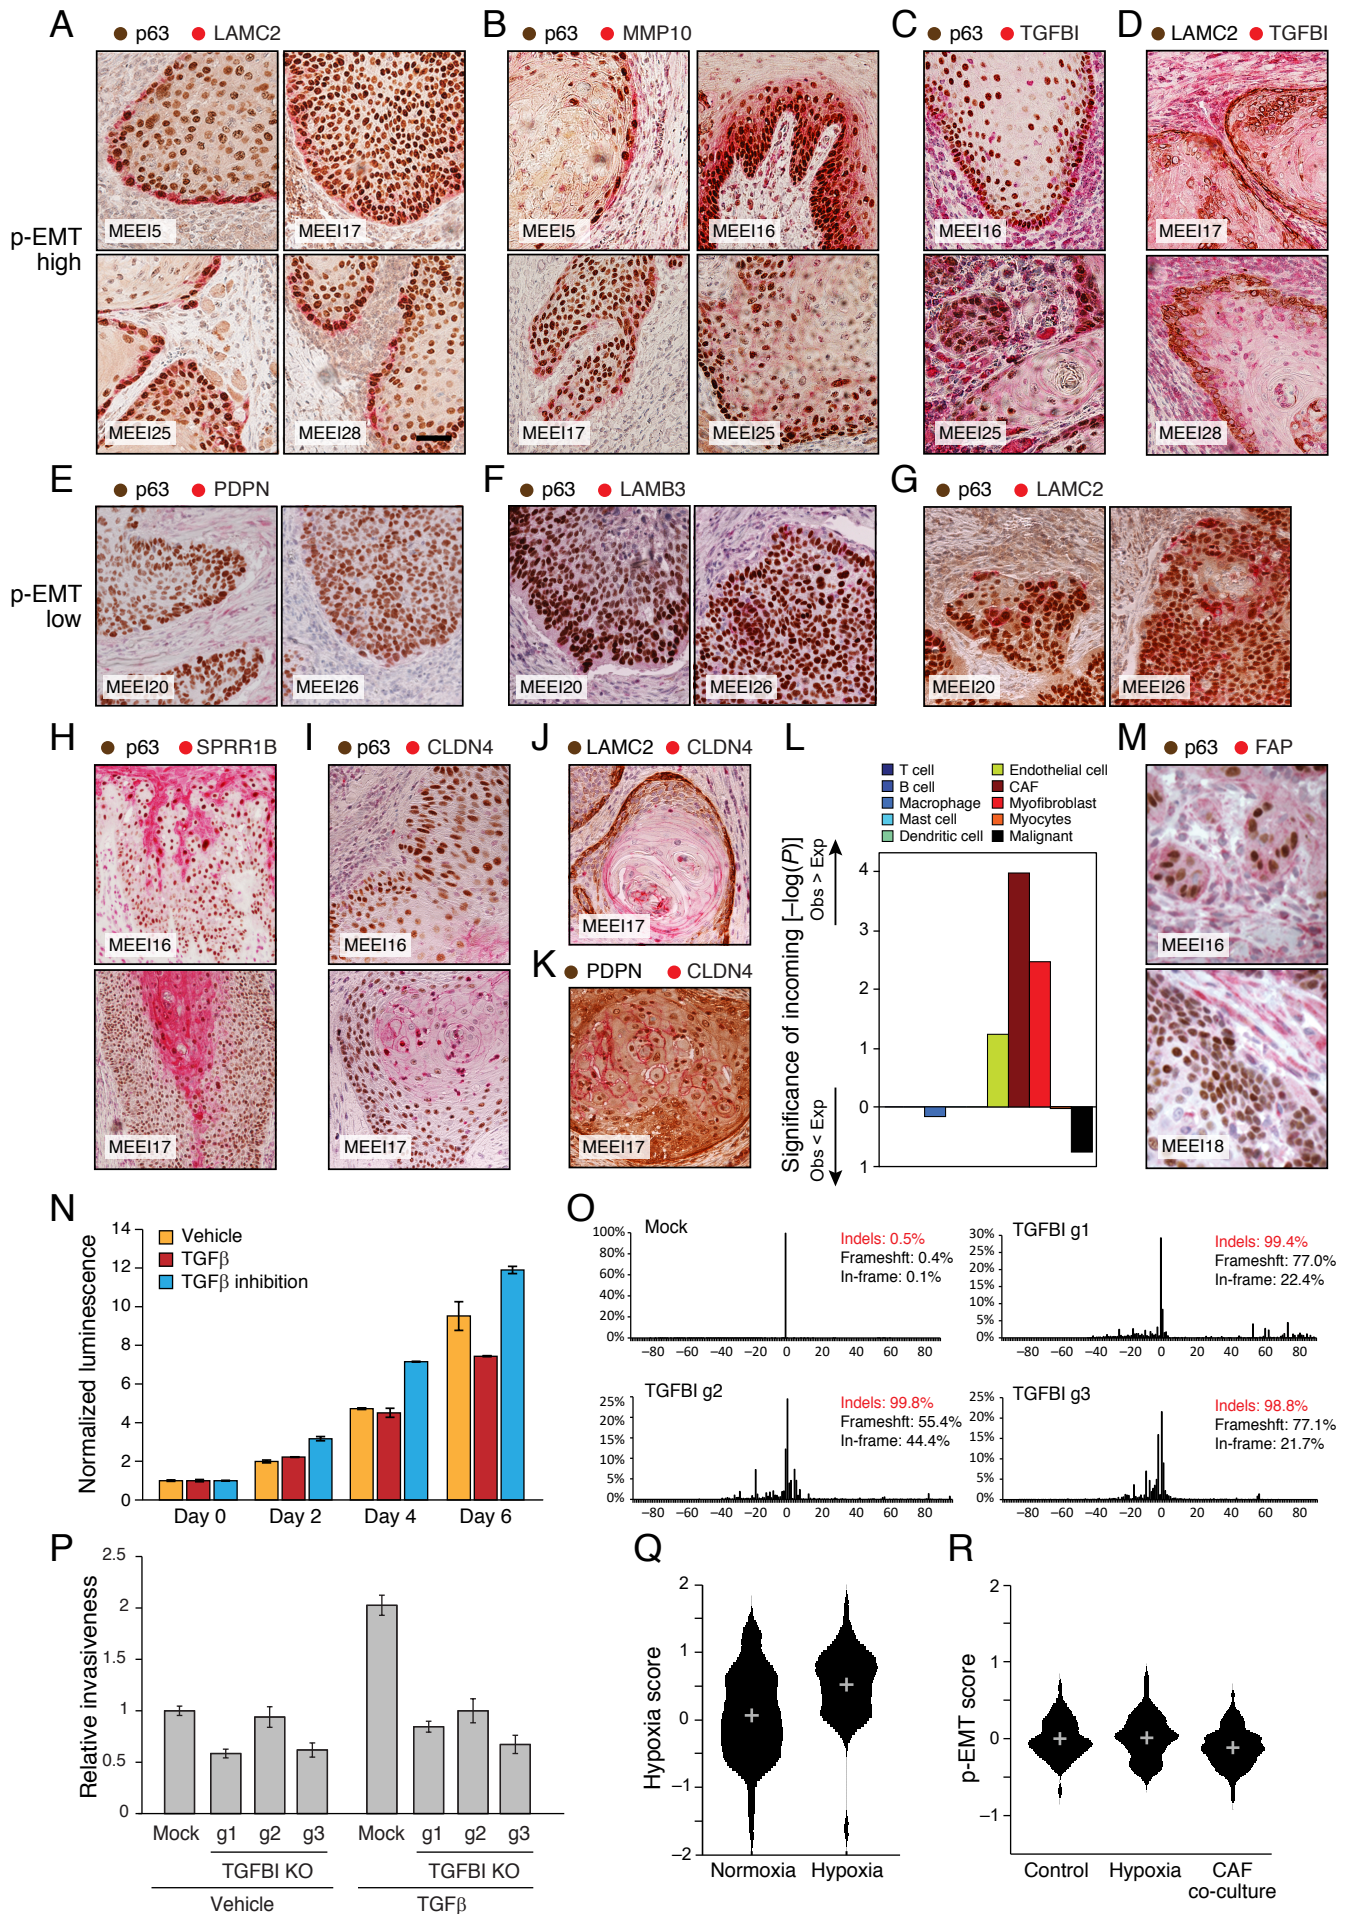

Supplement: NIHMS950993-supplement-5.pdf [file NIHMS950993-supplement-5.pdf]

# Supp. Figure 6

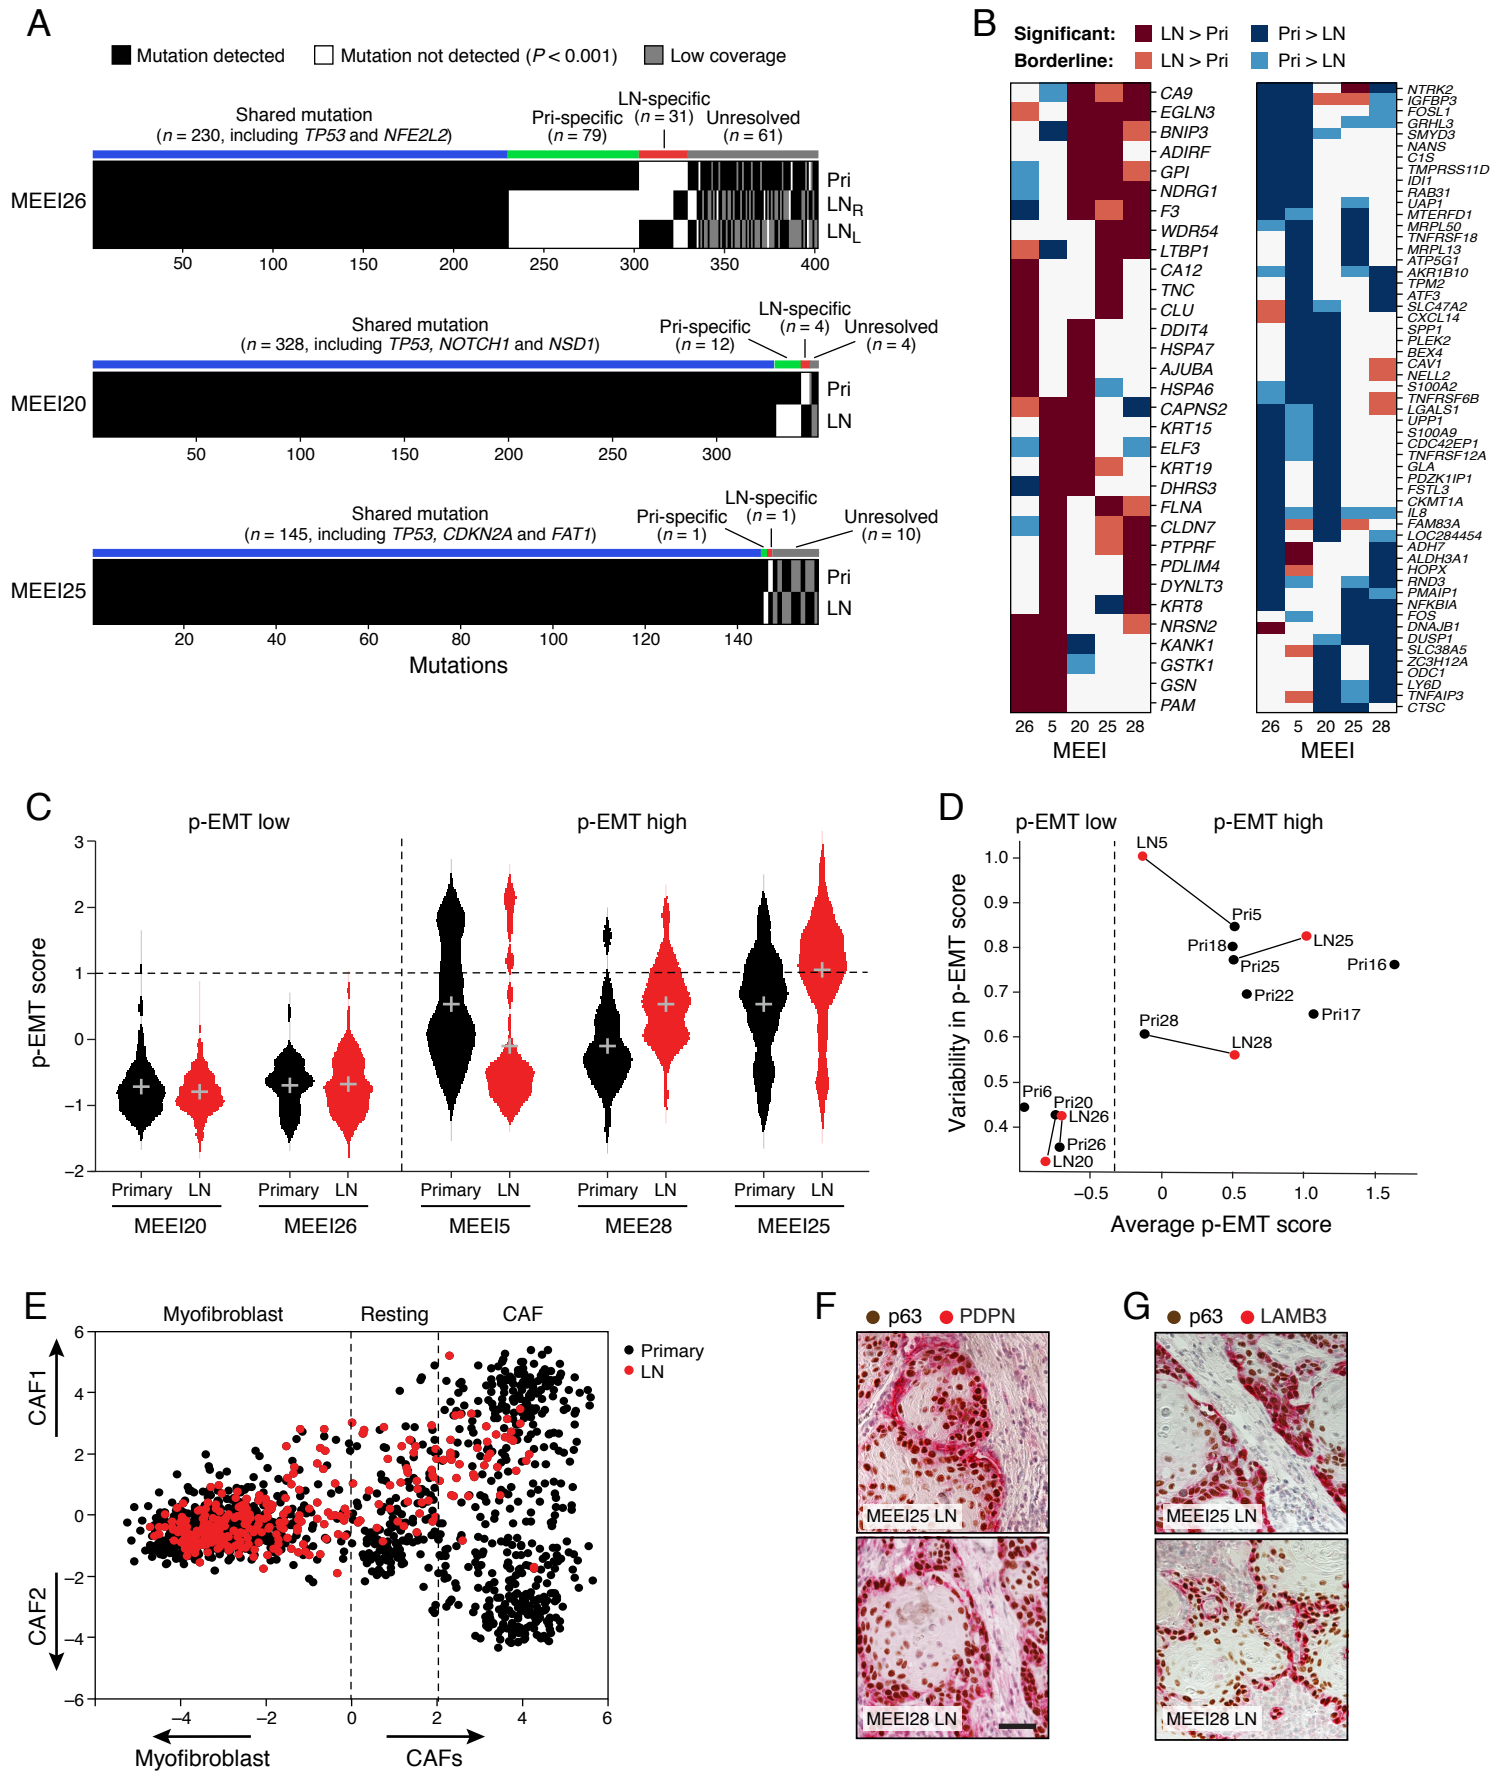

Supplement: NIHMS950993-supplement-6.pdf [file NIHMS950993-supplement-6.pdf]

# Supp. Figure 7

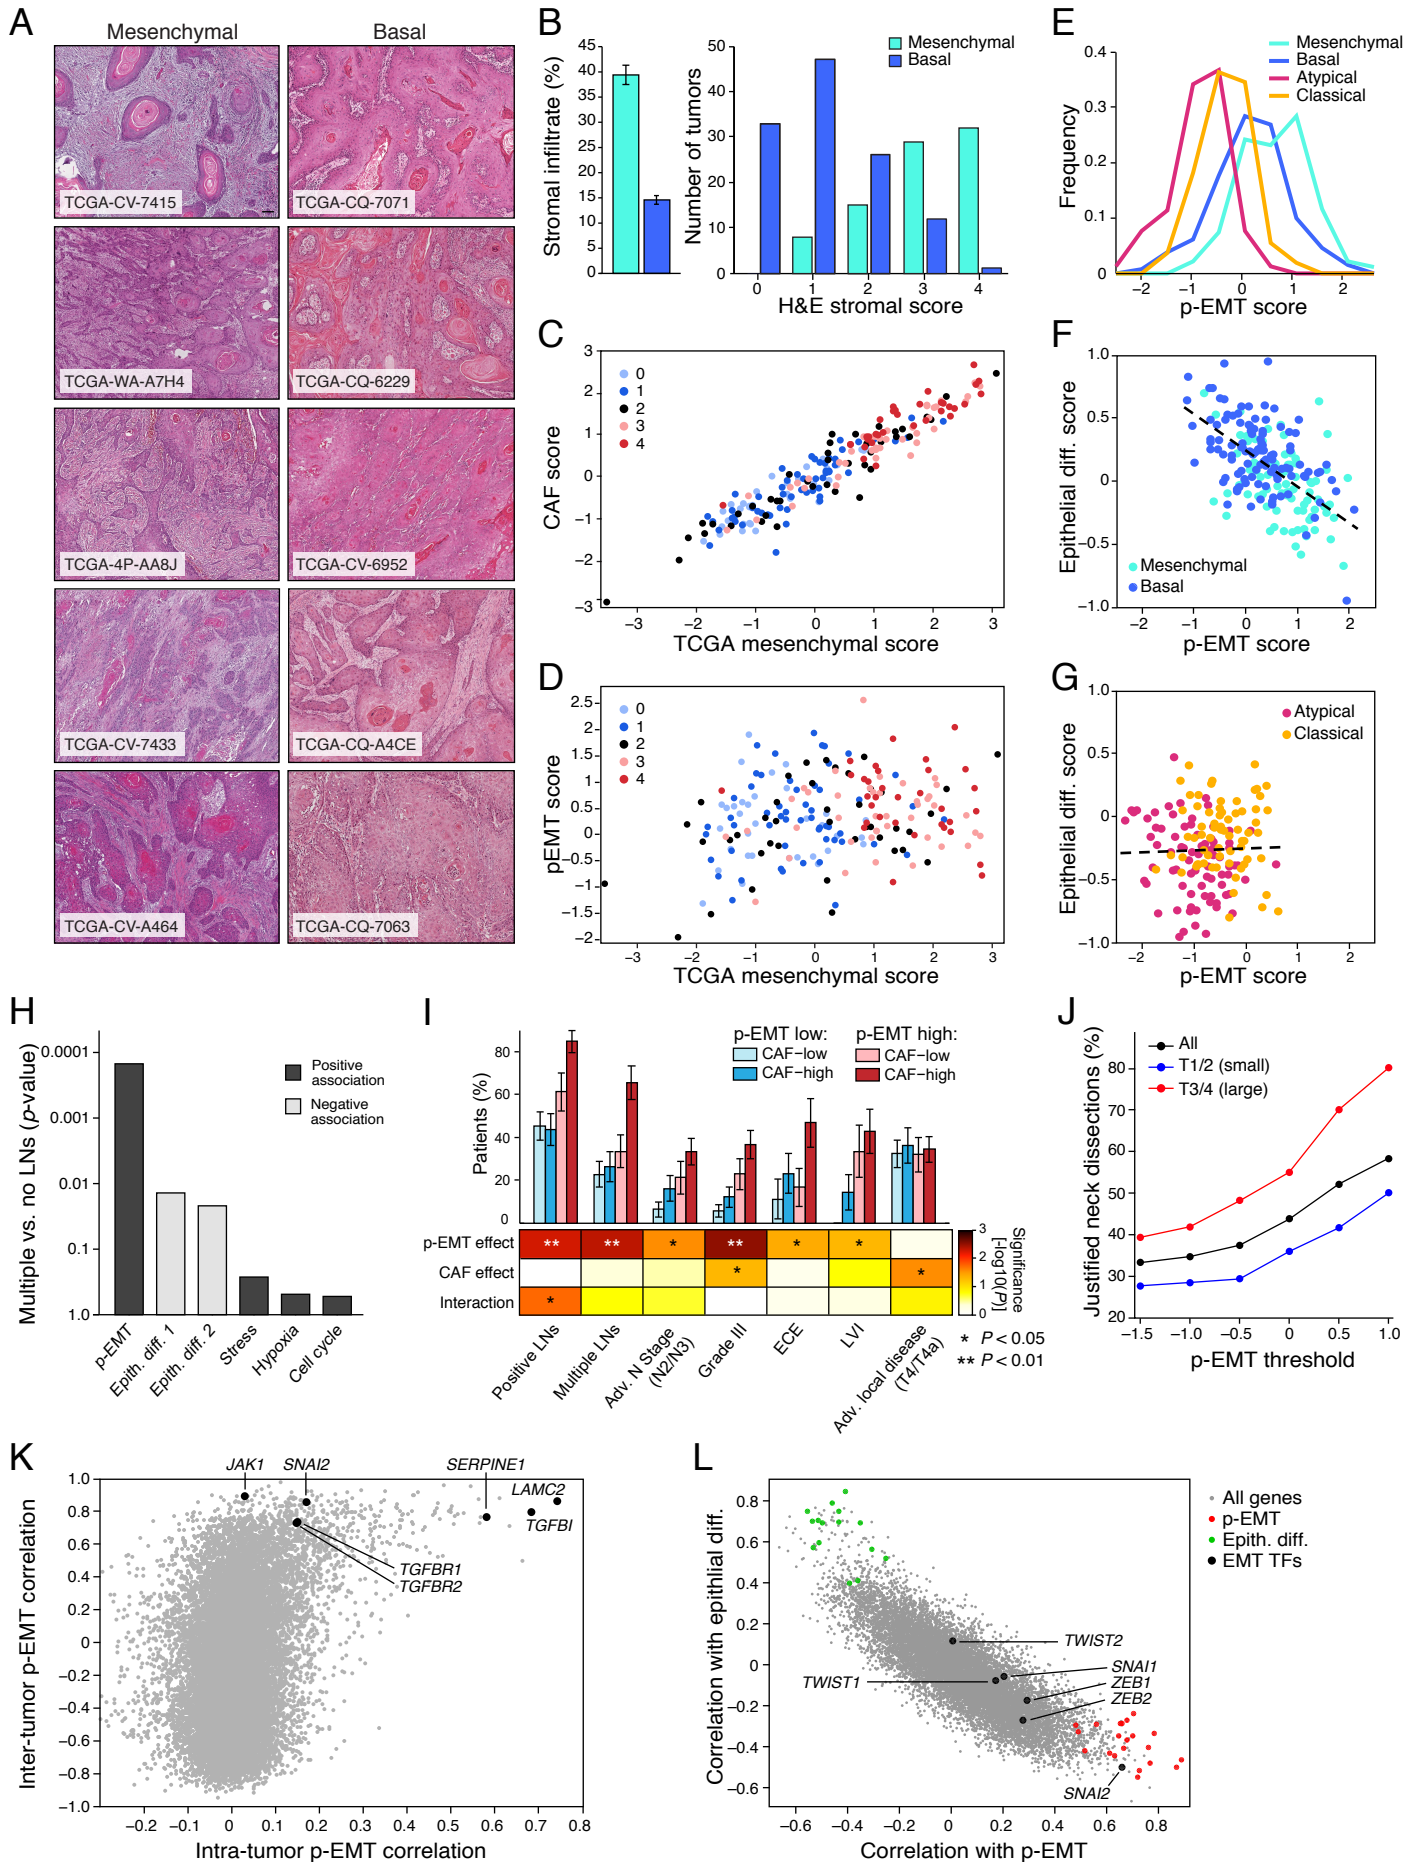

Supplement: NIHMS950993-supplement-7.pdf [file NIHMS950993-supplement-7.pdf]
